# Supplementary material
Source: HighWire-hosted journal article supplement (https://erj.ersjournals.com/content/61/5/2201634)

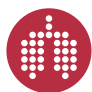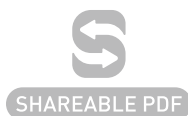

# A predictive model for acute exacerbation of idiopathic interstitial pneumonias

Masato Karayama <sup>1</sup>, Yoichiro Aoshima <sup>1</sup>, Takahito Suzuki <sup>1</sup>, Kazutaka Mori <sup>2</sup>, Nobuko Yoshizawa <sup>3</sup>, Shintaro Ichikawa <sup>3</sup>, Shinpei Kato <sup>4</sup>, Koshi Yokomura <sup>4</sup>, Masato Kono <sup>5</sup>, Dai Hashimoto <sup>5</sup>, Yusuke Inoue <sup>1</sup>, Hideki Yasui <sup>1</sup>, Hironao Hozumi <sup>1</sup>, Yuzo Suzuki <sup>1</sup>, Kazuki Furuhashi <sup>1</sup>, Tomoyuki Fujisawa <sup>1</sup>, Noriyuki Enomoto <sup>1</sup>, Satoshi Goshima <sup>3</sup>, Naoki Inui <sup>1,6</sup> and Takafumi Suda <sup>1</sup>

<sup>1</sup>Second Division, Department of Internal Medicine, Hamamatsu University School of Medicine, Hamamatsu, Japan. <sup>2</sup>Department of Respiratory Medicine, Shizuoka City Shimizu Hospital, Shizuoka, Japan. <sup>3</sup>Department of Radiology, Hamamatsu University School of Medicine, Hamamatsu, Japan. <sup>4</sup>Department of Respiratory Medicine, Seirei Mikatahara General Hospital, Hamamatsu, Japan. <sup>5</sup>Department of Respiratory Medicine, Seirei Hamamatsu General Hospital, Hamamatsu, Japan. <sup>6</sup>Department of Clinical Pharmacology and Therapeutics, Hamamatsu University School of Medicine, Hamamatsu, Japan.

Corresponding author: Masato Karayama ([karayama@hama-med.ac.jp](mailto:karayama@hama-med.ac.jp))

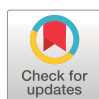

Shareable abstract (@ERSpublications)

A predictive model using existence of radiographic honeycombing, age >75 years and serum lactate dehydrogenase level >222 U·L<sup>-1</sup> discriminated the risk of acute exacerbation in patients with idiopathic interstitial pneumonias. <https://bit.ly/3YvSkrc>

**Cite this article as:** Karayama M, Aoshima Y, Suzuki T, et al. A predictive model for acute exacerbation of idiopathic interstitial pneumonias. *Eur Respir J* 2023; 61: 2201634 [DOI: 10.1183/13993003.01634-2022].

This single-page version can be shared freely online.

Copyright ©The authors 2023.

This version is distributed under the terms of the Creative Commons Attribution Non-Commercial Licence 4.0. For commercial reproduction rights and permissions contact [permissions@ersnet.org](mailto:permissions@ersnet.org)

This article has an editorial commentary:  
<https://doi.org/10.1183/13993003.00459-2023>

Received: 20 Aug 2022  
Accepted: 6 Feb 2023

## Abstract

**Background** Acute exacerbation of idiopathic interstitial pneumonias (AE-IIPs) induces permanent pulmonary dysfunction and is potentially lethal. The unpredictable occurrence of AE-IIPs remains an important clinical issue in the management of IIPs.

**Methods** In this multicentre, retrospective, observational study, a predictive score for AE-IIPs was designed using clinical factors based on multivariate Fine–Gray analysis in patients with IIPs.

**Results** Based on multivariate Fine–Gray analysis in an exploratory cohort of 487 patients with IIPs, the predictive score for AE-IIPs was determined as follows: 1 point each was added for honeycombing on high-resolution computed tomography (H), age >75 years (A) and lactate dehydrogenase level >222 U·L<sup>-1</sup> (L); the total score ranged from 0 to 3 (HAL score). The HAL score discriminated the risk of AE-IIPs with a C-index of 0.62 (95% CI 0.56–0.67); this discrimination was verified in a validation cohort of 402 patients with IIPs with a C-index of 0.67 (95% CI 0.60–0.73). In a combined cohort, the estimated cumulative risks for AE-IIPs at 1, 2, 3, 5 and 10 years were 1.9%, 3.5%, 5.1%, 7.7% and 12.9%, respectively, in the total score 0 group; 4.7%, 8.3%, 12.0%, 17.7% and 28.4%, respectively, in the total score 1 group; and 8.0%, 14.2%, 19.7%, 28.7% and 43.0%, respectively, in the total score ≥2 group. Subgroup analysis revealed that the HAL score was applicable to patients with and without idiopathic pulmonary fibrosis.

**Conclusions** The HAL score discriminated the risk of AE-IIPs and could aid in the management of IIPs.

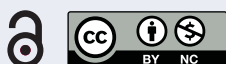

Supplement: inline-supplementary-material-2 [file inline-supplementary-material-2.pdf]
